# Supplementary material for: Understanding the reaction mechanism of anti-addition of (NHC)Au( i )–H and (NHC)Au( i )–F across alkyne
Source: Royal Society of Chemistry journal article supplement (doi:10.1039/d5qo00432b), 2025-01-01
Supplement: d5qo00432b1.pdf [file d5qo00432b1.pdf]

*Supporting Information for*

**Understanding the Reaction Mechanism of *anti*-Addition of (NHC)Au(I)-H and (NHC)Au(I)-F across  
Alkyne**

Wing Chun Chan and Zhenyang Lin\*

Department of Chemistry, The Hong Kong University of Science and Technology, Clear Water Bay,  
Kowloon 999077, Hong Kong

\*Corresponding Author

Email: chzlin@ust.hk

Figures and Tables

**Fig. S1** Gibbs energy profile for addition reaction of LAu-H across  $\text{PhC}\equiv\text{CPh}$

**Fig. S2** Gibbs energy profile for addition reaction of LAu-H across  $\text{MeC}\equiv\text{CMe}$

**Fig. S3** Gibbs energy profile for addition reaction of L'Au-F across  $\text{MeOCC}\equiv\text{CCOOMe}$

**Table S1**  $\Delta G_{\text{TS1\_P\_Ar\_Z}}$  of addition reactions of LAu-H across  $\text{ArC}\equiv\text{CAr}$ .

**Table S2**  $\Delta G_{2\_2\_Ar}$  and  $\Delta G_{\text{TS2\_P\_Ar\_E}}$  of addition reactions of L'Au-F across  $\text{ArC}\equiv\text{CAr}$ .

**Fig. S4** Gibbs energy profile for addition reaction of LAu-Me across  $\text{MeOCC}\equiv\text{CCOOMe}$ .

**Table S3** Gibbs energies of selected intermediates and transition states calculated for addition reactions of L'Au-X (X = Cl, Br and I) across  $\text{PhC}\equiv\text{CMe}$ .

**Table S4** Calculated barriers and reaction energies for the addition reactions of LAu-H, (CAAC)Au-H and  $\text{PPh}_3\text{Au-H}$  with  $\text{MeOCC}\equiv\text{CCOOMe}$ .

**Table S5** Calculated barriers and reaction energies for the addition reactions of LAu-H, (CAAC)Au-H and  $\text{PPh}_3\text{Au-H}$  with  $\text{MeC}\equiv\text{CPh}$ .

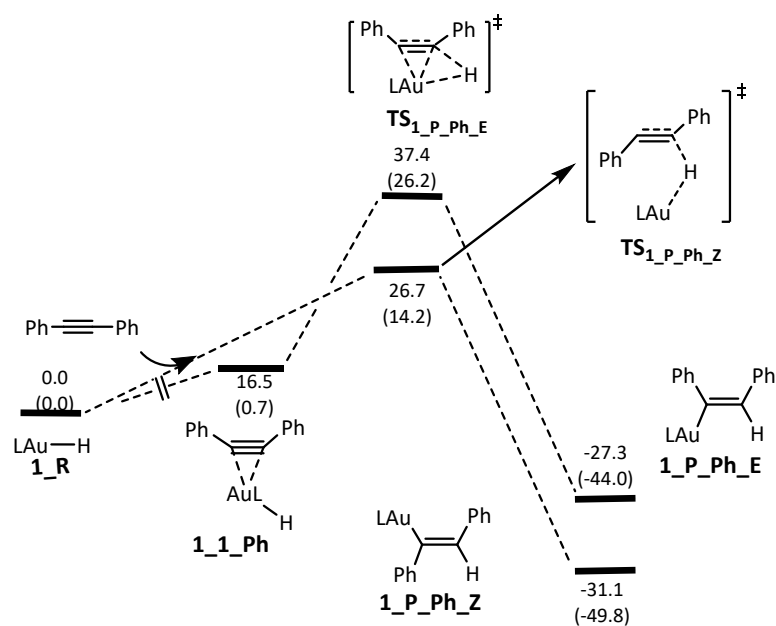

**Fig. S1** Gibbs energy profile for addition reaction of LAu-H across PhC≡CPh. Relative Gibbs energies and relative electronic energies (in parenthesis) are given in kcal/mol. See Scheme 1 in the main text for the structure of the N-heterocyclic carbene (NHC) ligand L.

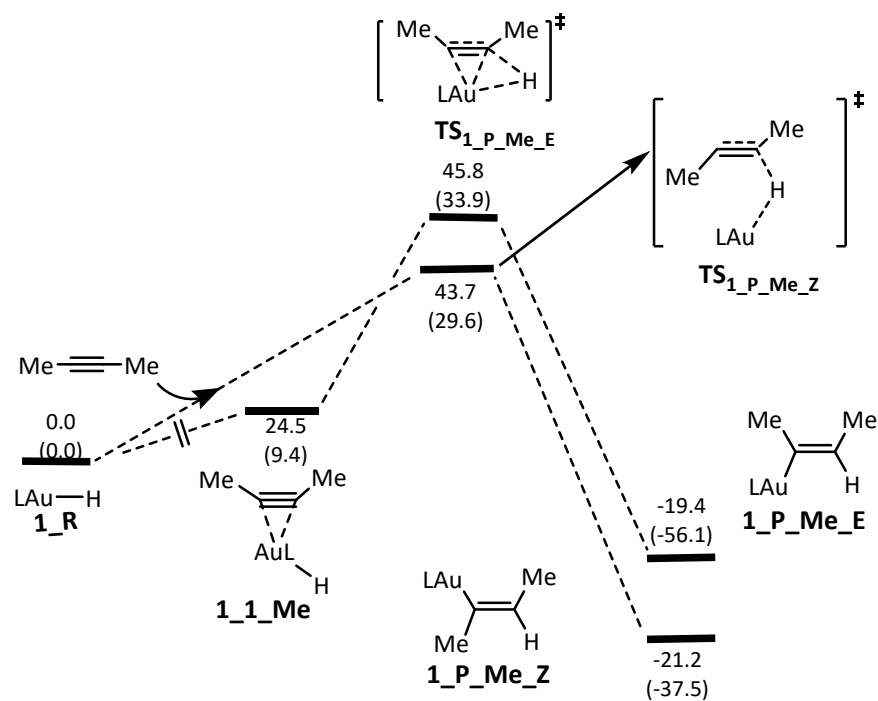

**Fig. S2** Gibbs energy profile for addition reaction of LAu-H across MeC≡CMe. Relative Gibbs energies and relative electronic energies (in parenthesis) are given in kcal/mol. See Scheme 1 in the main text for the structure of the N-heterocyclic carbene (NHC) ligand L.

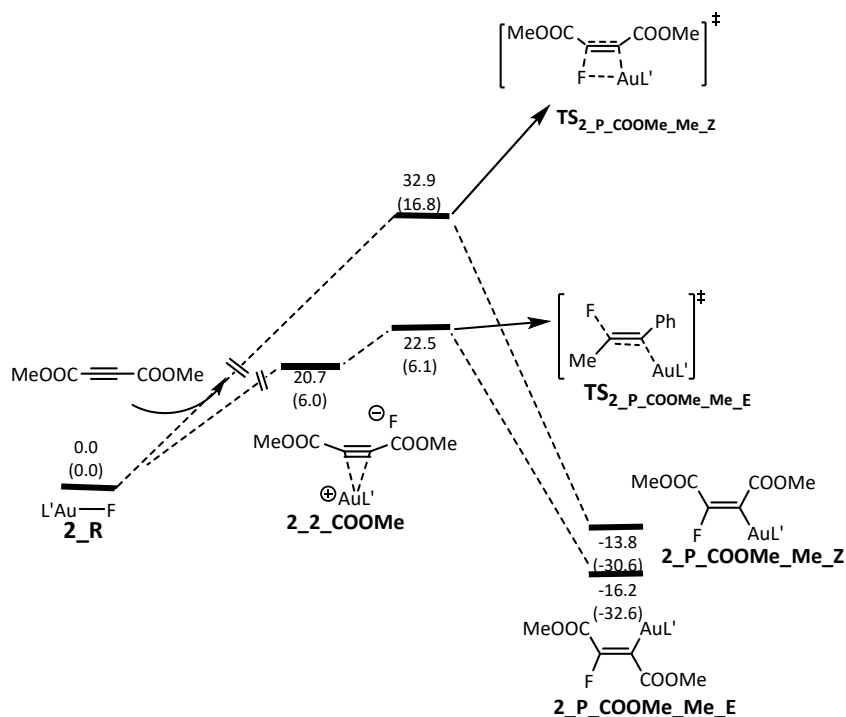

**Fig. S3** Gibbs energy profile for addition reaction of  $L'Au-F$  across  $MeOOC\equiv CCOOMe$ . Relative Gibbs energies and relative electronic energies (in parenthesis) are given in kcal/mol. See Scheme 1 in the main text for the structure of the N-heterocyclic carbene (NHC) ligand  $L'$ .

**Table 1**  $\Delta G_{TS1\_P\_Ar\_Z}$  of addition reactions of  $LAu-H$  across  $ArC\equiv CAr$  (see Figure S1 or S2 for the structure label  $TS1\_P\_Ar\_Z$ ). See Scheme 1 in the main text for the structure of the N-heterocyclic carbene (NHC) ligand  $L$ .

| Ar               | $\Delta G_{TS1\_P\_Ar\_Z}$ (kcal/mol) |
|------------------|---------------------------------------|
| $C_6H_4-p-NO_2$  | 18.2                                  |
| $C_6H_4-p-CN$    | 19.7                                  |
| $C_6H_4-p-NMe_2$ | 33.5                                  |
| $C_6H_4-p-OMe$   | 32.9                                  |

**Table 2**  $\Delta G_{2\_2\_Ar}$  and  $\Delta G_{TS2\_P\_Ar\_E}$  of addition reactions of  $L'Au-F$  across  $ArC\equiv CAr$  (see Figure S3 for the structure labels  $2\_2\_Ar$  and  $TS2\_P\_Ar\_E$ ). See Scheme 1 in the main text for the structure of the N-heterocyclic carbene (NHC) ligand  $L'$ .

| Ar               | $\Delta G_{2\_2\_Ar}$ (kcal/mol) | $\Delta G_{TS2\_P\_Ar\_E}$ (kcal/mol) |
|------------------|----------------------------------|---------------------------------------|
| $C_6H_4-p-NO_2$  | 13.8                             | 19.3                                  |
| $C_6H_4-p-CN$    | 14.1                             | 19.3                                  |
| $C_6H_4-p-NMe_2$ | 9.2                              | 17.4                                  |
| $C_6H_4-p-OMe$   | 12.0                             | 19.6                                  |

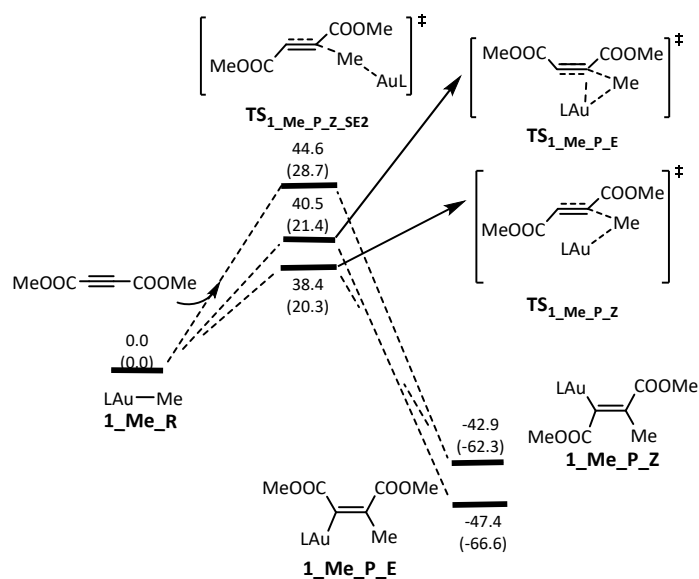

**Fig. S4** Gibbs energy profile for addition reaction of LAu-Me across MeOOC-C≡C-COOMe. Relative Gibbs energies and relative electronic energies (in parenthesis) are given in kcal/mol. See Scheme 1 in the main text for the structure of the N-heterocyclic carbene (NHC) ligand L.

**Table S3** Gibbs energies of selected intermediates and transition states calculated for addition reactions of L'Au-X (X = Cl, Br and I) across PhC≡CMe. See Scheme 1 in the main text for the structure of the N-heterocyclic carbene (NHC) ligand L'.

| L'Au-X/ $\Delta G$ (kcal/mol) | Syn                                                 |                                                   | Anti                                                |                                                   |
|-------------------------------|-----------------------------------------------------|---------------------------------------------------|-----------------------------------------------------|---------------------------------------------------|
|                               | Reaction barriers<br>( $\Delta G_{TS2\_P\_Me\_Z}$ ) | Reaction energies<br>( $\Delta G_{2\_P\_Me\_Z}$ ) | Reaction barriers<br>( $\Delta G_{TS2\_P\_Me\_Z}$ ) | Reaction energies<br>( $\Delta G_{2\_P\_Me\_Z}$ ) |
| Cl                            | 38.3                                                | 16.7                                              | 26.0                                                | 15.3                                              |
| Br                            | 40.5                                                | 18.5                                              | 27.8                                                | 16.2                                              |
| I                             | 37.1                                                | 20.7                                              | 25.8                                                | 19.5                                              |

**Table S4** Calculated barriers and reaction energies for the addition reactions of LAu-H, (CAAC)Au-H and PPh<sub>3</sub>Au-H with MeOOC≡CCOOMe.

|                                 | <b>Syn-addition</b>                                               |                                     | <b>Anti-addition</b>                                              |                                     |
|---------------------------------|-------------------------------------------------------------------|-------------------------------------|-------------------------------------------------------------------|-------------------------------------|
| (Ligand)Au-H /<br>ΔG (kcal/mol) | Reaction barrier ΔG <sup>‡</sup><br>( <b>TS<sub>1_P_E</sub></b> ) | Reaction energy<br>( <b>1_P_E</b> ) | Reaction barrier ΔG <sup>‡</sup><br>( <b>TS<sub>1_P_Z</sub></b> ) | Reaction energy<br>( <b>1_P_Z</b> ) |
| Ligand = L                      | 27.5                                                              | -36.8                               | 21.6                                                              | -40.7                               |
| Ligand = CAAC                   | 32.1                                                              | -38.8                               | 25.6                                                              | -40.5                               |
| Ligand = PPh <sub>3</sub>       | 31.1                                                              | -39.1                               | 21.1                                                              | -41.5                               |

L: See Scheme 1 in the main text for the structure of the N-heterocyclic carbene (NHC) ligand L.

CAAC: <sup>Ad</sup>CAAC from Ref [16] in the main text.

**Table S5** Calculated barriers and reaction energies for the addition reactions of LAu-H, (CAAC)Au-H and PPh<sub>3</sub>Au-H with MeC≡CPh.

|                                 | <b>Syn-addition</b>                                       |                                        | <b>Anti-addition</b>                                      |                                        |
|---------------------------------|-----------------------------------------------------------|----------------------------------------|-----------------------------------------------------------|----------------------------------------|
| (Ligand)Au-F /<br>ΔG (kcal/mol) | Reaction barrier ΔG <sup>‡</sup><br>( <b>TS2_P_Me_Z</b> ) | Reaction energy<br>( <b>2_P_Me_Z</b> ) | Reaction barrier ΔG <sup>‡</sup><br>( <b>TS2_P_Me_E</b> ) | Reaction energy<br>( <b>2_P_Me_E</b> ) |
| Ligand = L'                     | 33.7                                                      | -0.9                                   | 20.8                                                      | -1.5                                   |
| Ligand = CAAC                   | 32.1                                                      | -1.1                                   | 22.0                                                      | -2.7                                   |
| Ligand = PPh <sub>3</sub>       | 32.1                                                      | -1.3                                   | 26.5                                                      | -1.4                                   |

L': See Scheme 1 in the main text for the structure of the N-heterocyclic carbene (NHC) ligand L'.

CAAC: <sup>Ad</sup>CAAC from Ref [16] in the main text.
